# Supplementary material for: Low temperature crystallization of transparent, highly ordered nanoporous SnO2 thin films: application to room-temperature hydrogen sensing
Source: Royal Society of Chemistry journal article supplement (doi:10.1039/c1nr10678c), 2011-01-01
Supplement: c1nr10678c.pdf [file c1nr10678c.pdf]

## Supplemental Information

### Low Temperature Crystallization of Transparent, Highly-ordered Nanoporous SnO<sub>2</sub> Thin Films: Application to Room-temperature Hydrogen Sensing

Shaofeng Shao,<sup>1,2</sup> Xinmin Qiu,<sup>1</sup> Dafang He,<sup>1</sup> Ralf Koehn,<sup>2</sup> Naijia Guan,<sup>3</sup> Xiaohua Lu,<sup>1</sup>  
Ningzhong Bao,<sup>1\*</sup> Craig A. Grimes<sup>1\*</sup>

<sup>1</sup> State Key of Laboratory of Materials-Oriented Chemical Engineering, Nanjing University of Technology, Nanjing 210009, People's Republic of China.

<sup>2</sup> Department of Chemistry & Biochemistry, University of Munich, Germany.

<sup>3</sup> Lab of Functional Polymer Materials, N & T Joint Academy and Department of Materials Chemistry, College of Chemistry, Nankai University, Tianjin 300071, PRC

\*Email: [nzhaobao@njut.edu.cn](mailto:nzhaobao@njut.edu.cn); [craig.grimes40@gmail.com](mailto:craig.grimes40@gmail.com)

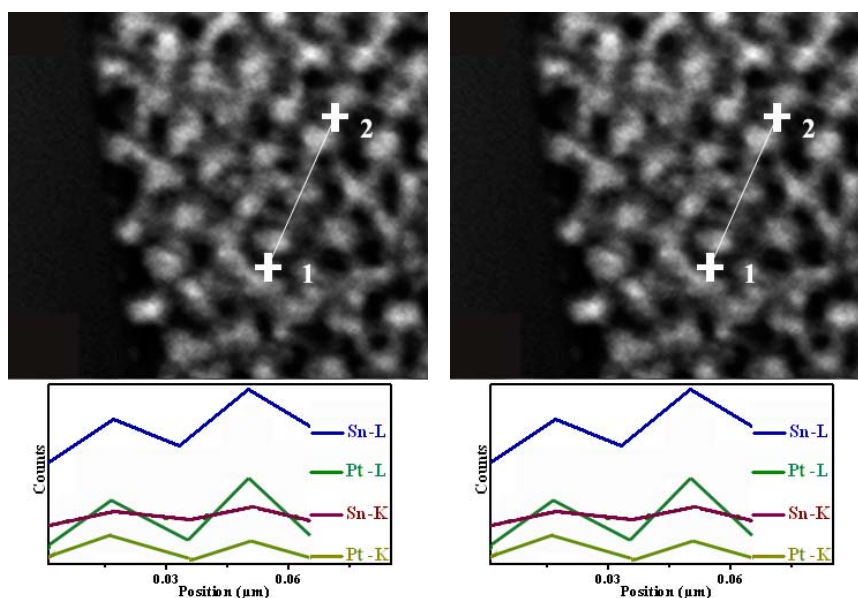

**Figure S1:** Energy dispersive X-ray scattering (EDX) line measurement taken through positions 1 and 2 from the above image showing the presence of Pt and Sn.

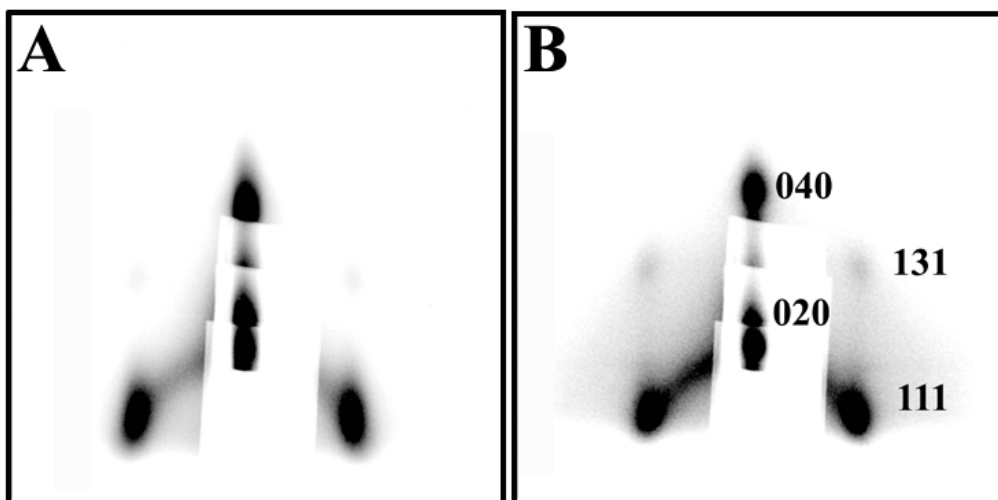

**Figure S2:** Grazing-Incidence Small-Angle X-ray Scattering (GISAXS) patterns of Pt-SnO<sub>2</sub> thin films after: (A) hydrothermal treatment at 100°C, and (B) annealing at 400°C. The samples were positioned with their surface quasi-parallel to the X-ray beam. The scattering patterns were recorded with a 2D detector set perpendicular to the incident beam.
